# Supplementary material for: Turning cationic antimicrobial peptide KR-12 into self-assembled nanobiotics with potent bacterial killing and LPS neutralizing activities
Source: Royal Society of Chemistry journal article supplement (doi:10.1039/d3nr05174a), 2023-12-18
Supplement: d3nr05174a1.pdf [file d3nr05174a1.pdf]

## 1 Supporting information

2

3 Turning cationic antimicrobial peptide KR-12 into Self-assembled nanobiotics with  
4 potent bacterial killing and LPS neutralizing activities

5

6 Ruyi Lei<sup>a#</sup>, Chujun Yang<sup>a,b#</sup>, Yaqi Sun<sup>c#</sup>, Dejian Li<sup>a</sup>, Liman Hao<sup>d</sup>, Yang Li<sup>d</sup>, Shuijing Wu<sup>d</sup>, Hui Li<sup>d</sup>,  
7 Chao Lan<sup>a</sup>, Xiangming Fang<sup>d</sup>

8

9 ✉ Xiangming Fang, [xmfang@zju.edu.cn](mailto:xmfang@zju.edu.cn); Ruyi Lei, [ruylei@zzu.edu.cn](mailto:ruylei@zzu.edu.cn); Chao Lan,  
10 [lanchao29@163.com](mailto:lanchao29@163.com)

11

12 <sup>a</sup> Department of Emergency Medicine, The First Affiliated Hospital of Zhengzhou University,  
13 Zhengzhou 450052, China

14 <sup>b</sup> Academy of Medical Sciences, Zhengzhou University, Zhengzhou 450052, China

15 <sup>c</sup> China National Clinical Research Center for Child Health, Children's Hospital, Zhejiang University  
16 School of Medicine, Hangzhou 310052, China

17 <sup>d</sup> Department of Anesthesiology, The First Affiliated Hospital, School of Medicine, Zhejiang University,  
18 Hangzhou 310003, China

19 #Contributed equally.

20

21

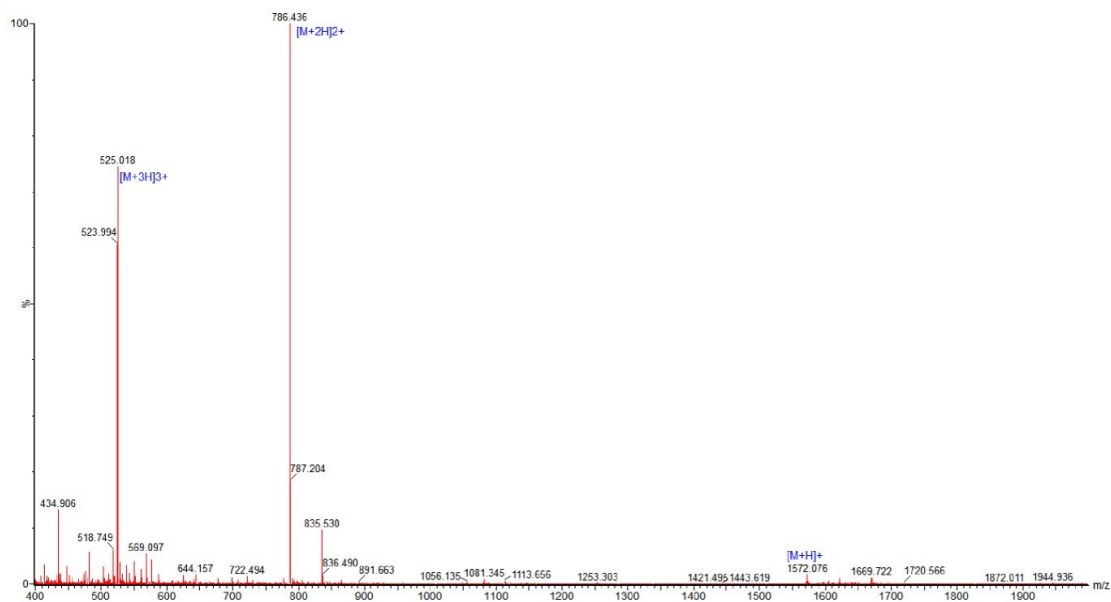

23 Figure S1. Electrospray ionization (ESI) mass spectrum (MS) of KR-12. The calculated molecular weight  
24 (MW) is 1571.95, and the observed MW is 1572.05.

25

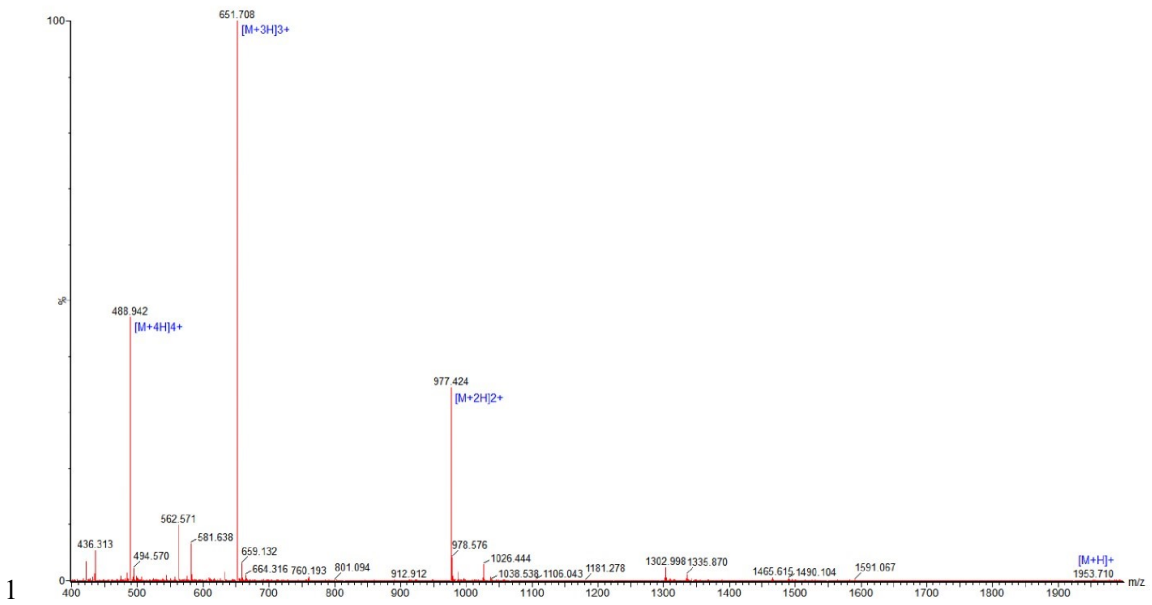

2 Figure S2. Electrospray ionization (ESI) mass spectrum (MS) of Myr-KR-12N. The calculated molecular  
 3 weight (MW) is 1952.48, and the observed MW is 1952.12.  
 4

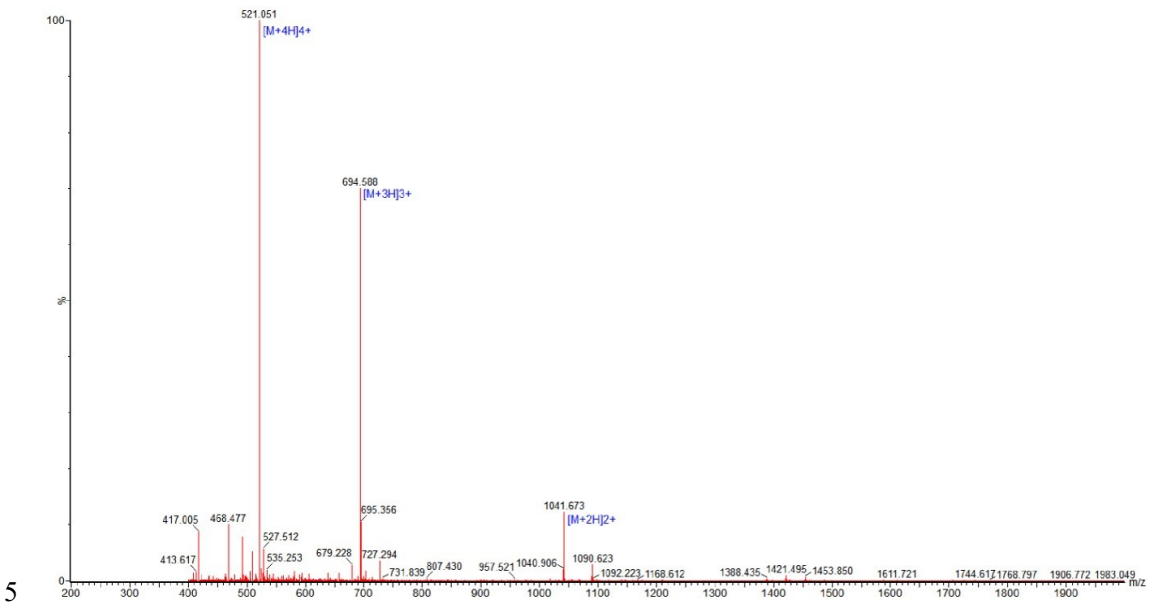

6 Figure S3. Electrospray ionization (ESI) mass spectrum (MS) of Myr-KR-12C. The calculated molecular  
 7 weight (MW) is 2081.65, and the observed MW is 2081.76.  
 8

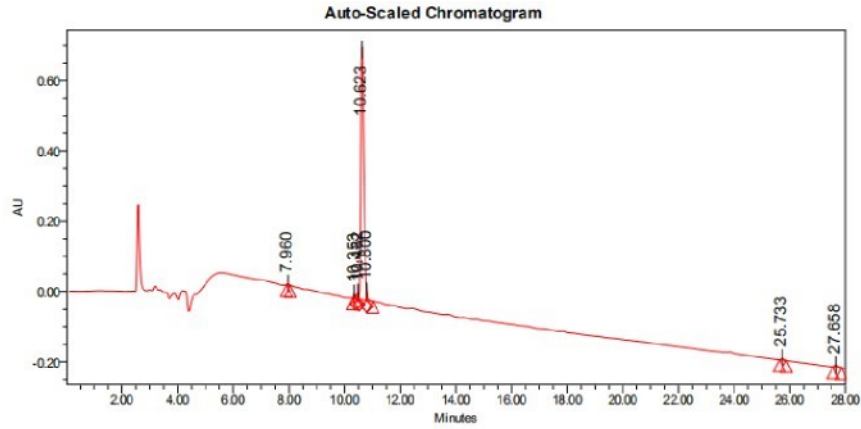

| Peak Results |        |         |        |        |
|--------------|--------|---------|--------|--------|
|              | RT     | Area    | Height | % Area |
| 1            | 7.960  | 12442   | 3114   | 0.22   |
| 2            | 10.353 | 54054   | 12329  | 0.96   |
| 3            | 10.482 | 78729   | 15805  | 1.39   |
| 4            | 10.623 | 5396589 | 723778 | 95.07  |
| 5            | 10.800 | 56279   | 24390  | 0.99   |
| 6            | 25.733 | 33481   | 5500   | 0.59   |
| 7            | 27.658 | 44618   | 5366   | 0.79   |

1

2 Figure S4. High-performance liquid chromatography (HPLC) analysis of KR-12. HPLC analysis of KR-  
 3 12 was performed to confirm its purity of 95.07%.

4

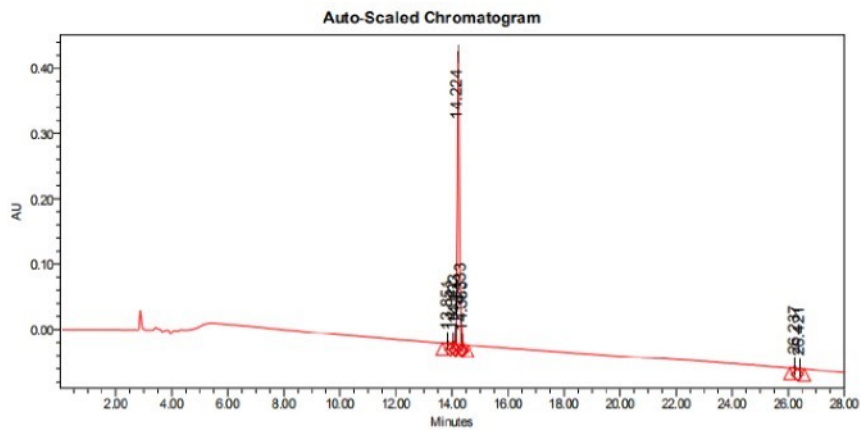

| Peak Results |        |         |        |        |
|--------------|--------|---------|--------|--------|
|              | RT     | Area    | Height | % Area |
| 1            | 13.851 | 20698   | 3631   | 0.74   |
| 2            | 14.042 | 23571   | 4249   | 0.83   |
| 3            | 14.133 | 11766   | 13868  | 0.42   |
| 4            | 14.224 | 2895392 | 451391 | 95.48  |
| 5            | 14.333 | 40225   | 31249  | 1.42   |
| 6            | 14.383 | 4784    | 3462   | 0.17   |
| 7            | 26.237 | 16670   | 3020   | 0.60   |
| 8            | 26.421 | 9526    | 1613   | 0.34   |

5

6 Figure S5. High-performance liquid chromatography (HPLC) analysis of Myr-KR-12N. HPLC analysis  
 7 of Myr-KR-12N was performed to confirm its purity of 95.48%.

8

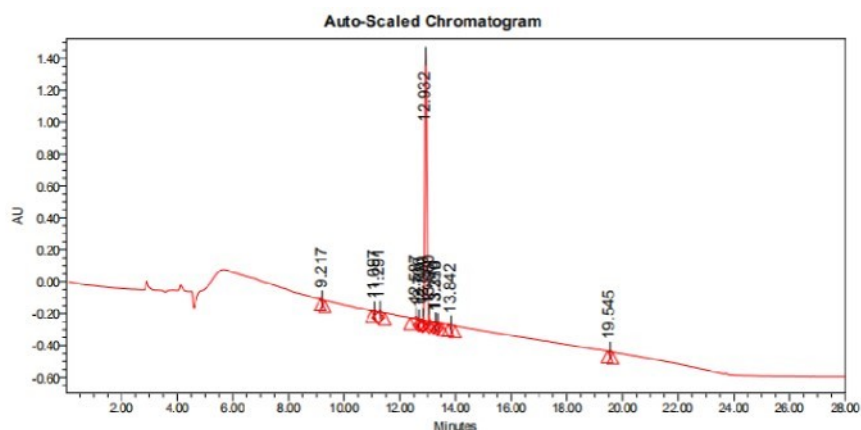

| Peak Results |        |         |         |        |
|--------------|--------|---------|---------|--------|
|              | RT     | Area    | Height  | % Area |
| 1            | 9.217  | 5773    | 1252    | 0.07   |
| 2            | 11.097 | 16934   | 3779    | 0.19   |
| 3            | 11.291 | 59175   | 13140   | 0.67   |
| 4            | 12.587 | 118391  | 17802   | 1.34   |
| 5            | 12.700 | 23127   | 4907    | 0.26   |
| 6            | 12.850 | 15318   | 18294   | 0.17   |
| 7            | 12.932 | 8461260 | 1649238 | 95.73  |
| 8            | 13.050 | 62699   | 36146   | 0.71   |
| 9            | 13.276 | 24641   | 4625    | 0.28   |
| 10           | 13.359 | 17204   | 2633    | 0.19   |

  

|    | RT     | Area  | Height | % Area |
|----|--------|-------|--------|--------|
| 11 | 13.842 | 13107 | 2789   | 0.15   |
| 12 | 19.545 | 21403 | 3448   | 0.24   |

1  
 2 Figure S6. High-performance liquid chromatography (HPLC) analysis of Myr-KR-12C. HPLC analysis  
 3 of Myr-KR-12C was performed to confirm its purity of 95.73%.

4

5 Table S1 Secondary structure of KR-12, Myr-KR-12N and Myr-KR-12C based on CD spectrum

|            | Helix 1 | Helix2 | Strand 1 | Strand 2 | Turns | Unordered | Total |
|------------|---------|--------|----------|----------|-------|-----------|-------|
| KR-12      | -0.001  | 0.028  | 0.295    | 0.196    | 0.229 | 0.253     | 0.999 |
| Myr-KR-12N | -0.001  | 0.028  | 0.294    | 0.195    | 0.228 | 0.252     | 0.997 |
| Myr-KR-12C | -0.001  | 0.028  | 0.295    | 0.196    | 0.229 | 0.252     | 0.998 |

6

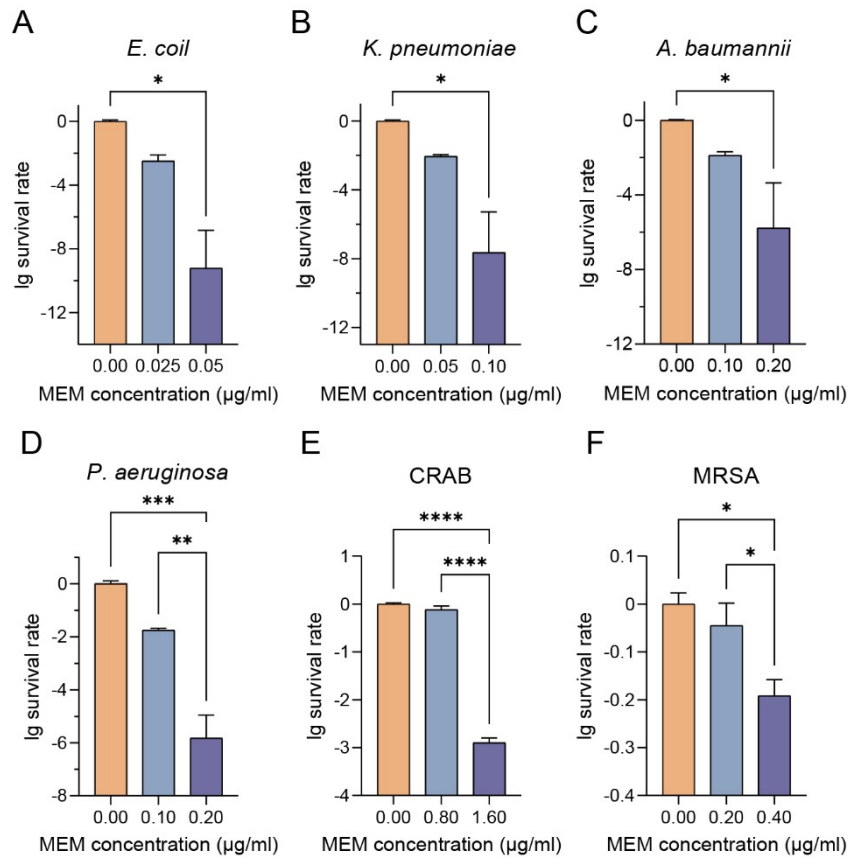

1  
 2 Figure S7. Antimicrobial efficacy of meropenem (MEM) against *E. coli*, *K. pneumoniae*, *A. baumannii*,  
 3 *P. aeruginosa*, carbapenem-resistant *A. baumannii* (CRAB), and methicillin-resistant *S. aureus* (MRSA)  
 4 was assessed. Bacterial cultures ( $2 \times 10^6$  CFU/ml) were exposed to MEM at different concentrations, and  
 5 the percentage of bacterial survival (represented on a logarithmic scale) was determined by comparing  
 6 colony counts from treated samples to those from mock-treated vehicle samples (0.00 µg/ml). The results  
 7 are presented as the mean value with accompanying SEM. Statistical significance was determined using  
 8 one-way analysis of variance (ANOVA) followed by Bonferroni's multiple comparisons test, with  
 9 significance levels denoted by asterisks as follows: \*  $p < 0.05$ , \*\*  $p < 0.01$ , \*\*\*  $p < 0.001$ , \*\*\*\*  $p < 0.0001$ .

10

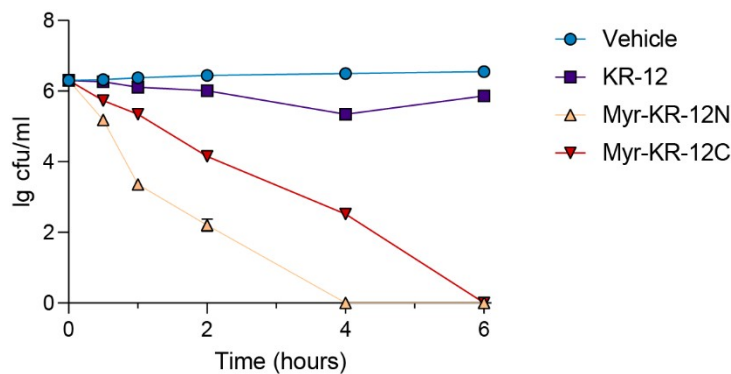

11

12 Figure S8. Time-kill kinetics of KR-12, Myr-KR-12N, and Myr-KR-12C at a concentration of 64 µg/ml  
 13 against carbapenem-resistant *A. baumannii* (CRAB). Data presented here are the average values from  
 14 three independent experiments, accompanied by SD.

15

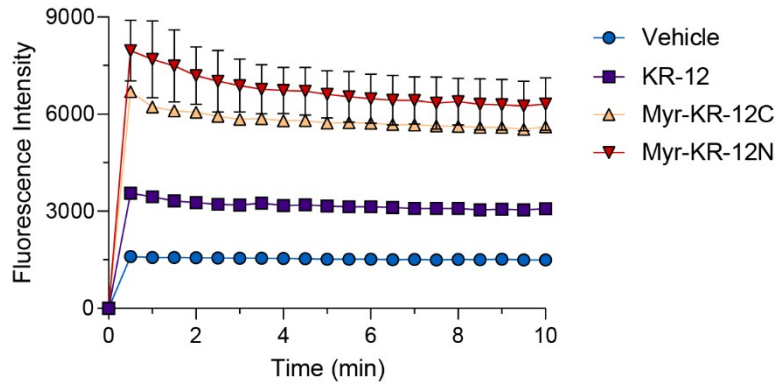

1

2 Figure S9. Evaluation of the outer membrane (OM) permeability of carbapenem-resistant *A. baumannii*  
 3 (CRAB) was conducted through the NPN uptake method, employing a peptide concentration of 128  
 4  $\mu\text{g/ml}$ . Data presented here are the average values from three independent experiments, accompanied by  
 5 SD.

6

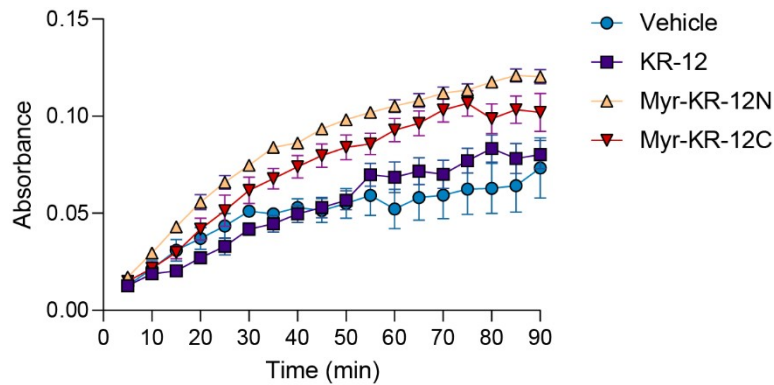

7

8 Figure S10. Evaluation of the inner membrane (IM) permeability of carbapenem-resistant *A. baumannii*  
 9 (CRAB) using the ONPG reagent at a peptide concentration of 128  $\mu\text{g/ml}$ . Data presented here are the  
 10 average values from three independent experiments, accompanied by SEM.

11

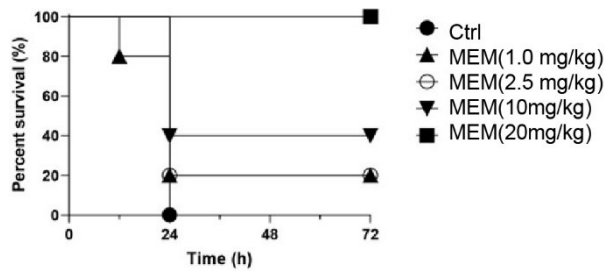

12

13 Figure S11. Therapeutic efficacy of MEM in bacterial sepsis. 5 mice per group were intraperitoneally  
 14 challenged with  $1 \times 10^7$  CFU of *E. coli*, and different doses of MEM were then administered as single-  
 15 dose treatments.

16

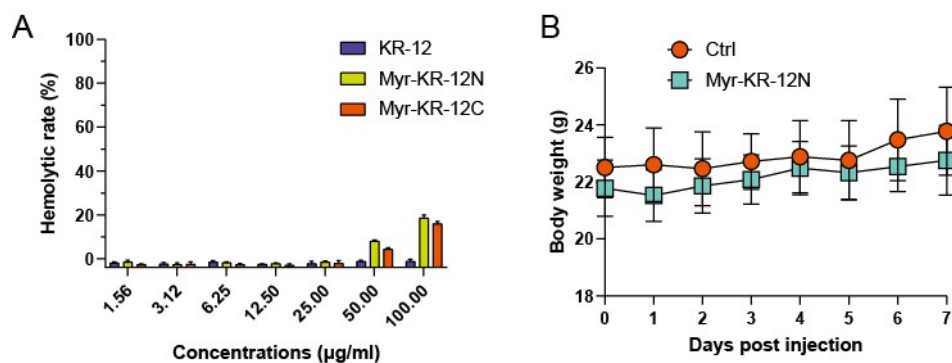

1  
 2 Figure S12. Toxicity of KR-12, Myr-KR-12N, and Myr-KR-12C *in vitro* and *in vivo*. (A) The dose-  
 3 dependent hemolytic activity of KR-12, Myr-KR-12N, and Myr-KR-12C was examined in mouse red  
 4 blood cells. Percent hemolysis was calculated as described in the experimental section. The data are  
 5 presented as mean  $\pm$  SD from five independent experiments. (B) Toxicity of Myr-KR-12N *in vivo*. 5  
 6 mice per group were intraperitoneally injected with 5 mg/kg of Myr-KR-12N per experimental animal  
 7 or PBS as control. Body weight was monitored every day for 7 days. No difference was observed between  
 8 the 2 groups.  
 9

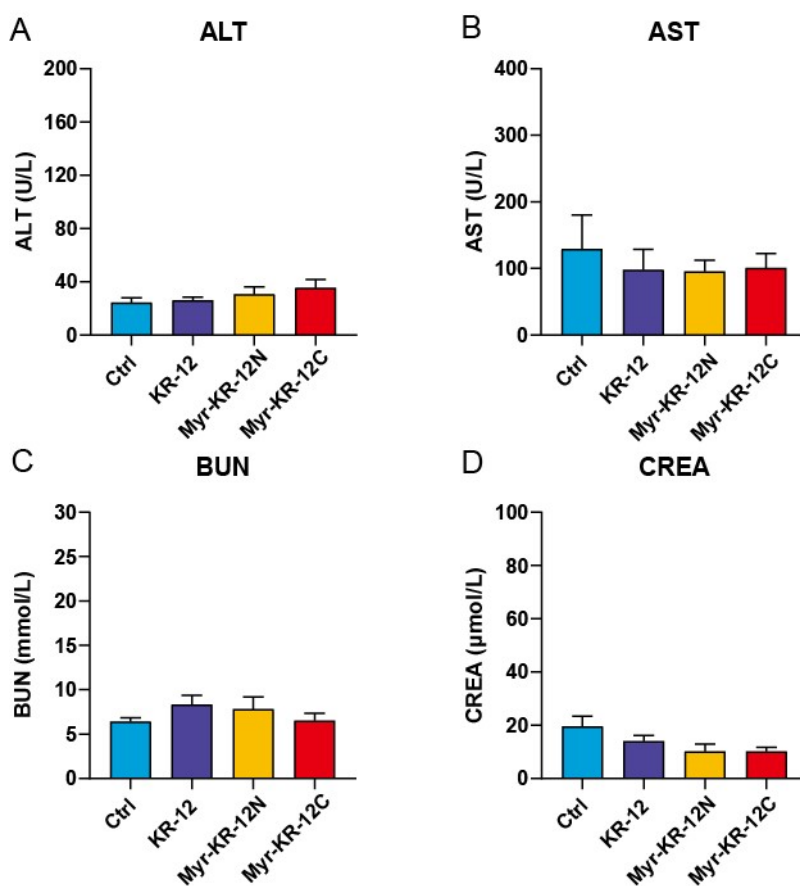

10  
 11 Figure S13. Toxicity of KR-12, Myr-KR-12N, and Myr-KR-12C *in vivo*. four groups of mice (6 mice  
 12 per group) were subcutaneously injected with 12 mg/kg of KR-12, Myr-KR-12N, or Myr-KR-12C or  
 13 PBS every 2 h for 6 times injection. At 20 h after the last injection of the drug, liver, kidney and blood  
 14 were collected from the mice. Serum was taken for liver function (A-B) and kidney function (C-D) tests.  
 15 No liver or kidney dysfunction was observed after treating with these nanobiotics.

1

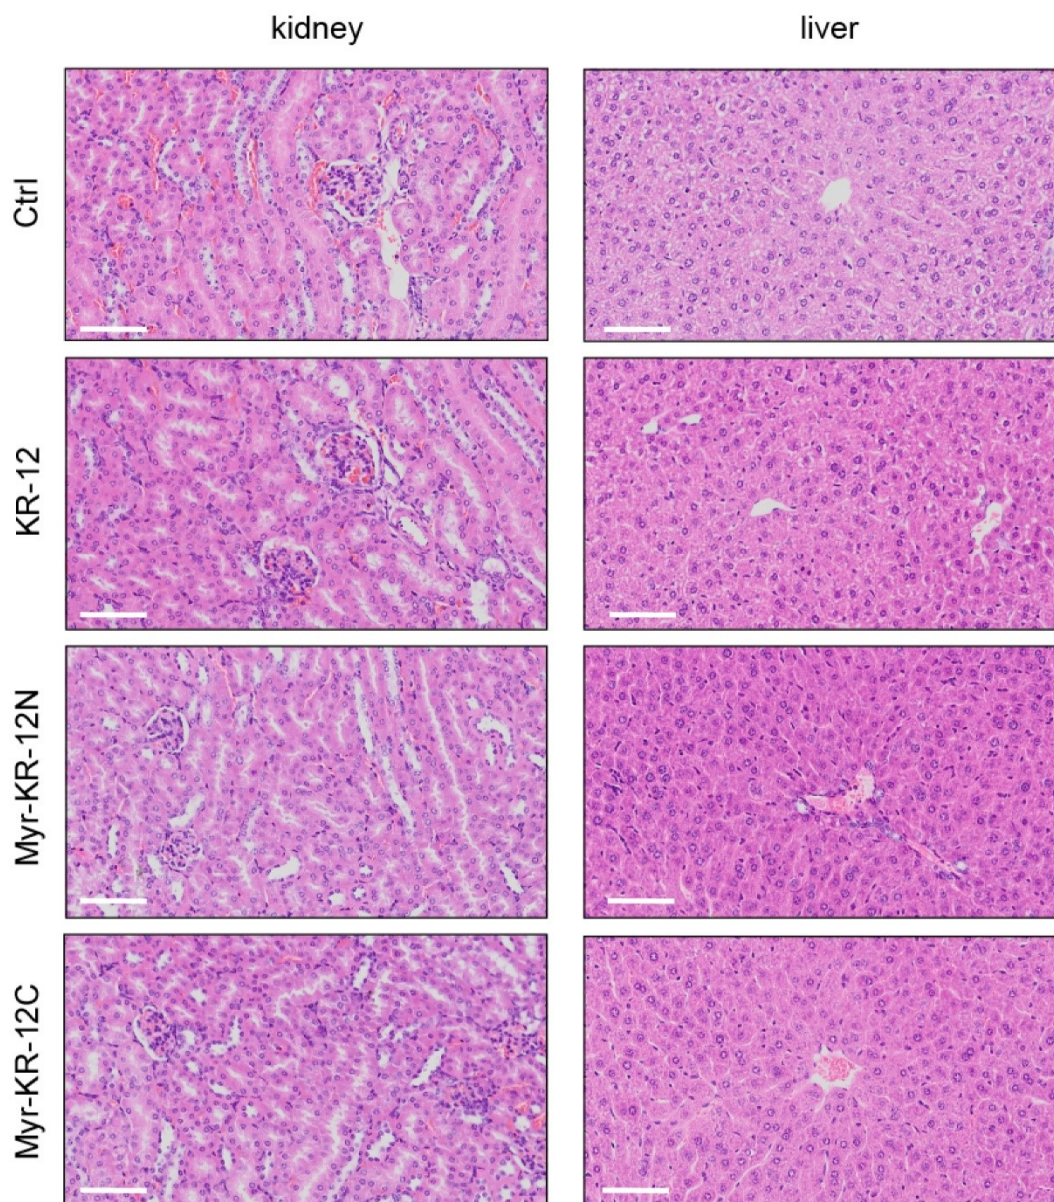

2

3 Figure S14. Toxicity of KR-12, Myr-KR-12N, and Myr-KR-12C *in vivo*. 4 groups of mice (6 mice per  
4 group) were subcutaneously injected with 12 mg/kg of KR-12, Myr-KR-12N, or Myr-KR-12C or PBS  
5 every 2 h for 6 times. At 20 h after the last injection of the drug, liver, kidney, and blood were collected  
6 from the mice. The liver and kidney were fixed in formalin and then subjected to histopathological  
7 examination; scale bar = 100  $\mu$ m. No histopathological changes were observed after treating with these  
8 peptides.

9
